# Supplementary material for: An APOE ε4–Uric Acid Axis Underpins Mesoamerican Nephropathy
Source: Research Square preprint supplement (doi:10.21203/rs.3.rs-7880187/v1), 2025-10-30
Supplement: Supplementary file 1 [file 1fb82be38527059ce2081185.docx]

**An *APOE ε4*–Uric Acid Axis Underpins Mesoamerican Nephropathy**

*Iván Landires 1,2,3,+,*, Karen Courville 1,4,+, Raúl Cumbrera 1,Norman Bustamante 1, 4, Gumercindo Pimentel-Peralta 1, Jorge I. Velez 5, Richard J. Johnson 6*,

*Mauricio Arcos-Burgos 7,+, Virginia Núñez-Samudio 1,2,8, +*

***________________________________________***

1. *Unidad de Genética y Salud Pública, Instituto de Ciencias Médicas, Las Tablas 0710-00043, Panama.*
2. *ICM LAB, Las Tablas 0710, Panama.*
3. *Consulta de Genética Médica, Hospital Joaquín Pablo Franco Sayas, Ministry of Health, Las Tablas, Panama.*
4. *Unidad de Hemodiálisis, Departamento de Nefrología, Hospital Dr. Gustavo N. Collado, Caja de Seguro Social, Chitré, Herrera, Panama.*
5. *Department of Industrial Engineering, Universidad del Norte, Barranquilla 081007, Colombia.*
6. *Division of Renal Diseases and Hypertension, University of Colorado Anschutz Medical Campus, Aurora, CO, USA.*
7. *Instituto de Investigaciones Médicas, Facultad de Medicina, Universidad de Antioquia, Medellín, Colombia.*
8. *Sección de Epidemiología, Departamento de Salud Pública, Región de Salud de Herrera, Ministry of Health, Chitre 0601, Panama*

**+** These authors have contributed equally to this work and share senior authorship.

***** Correspondence to: **Iván Landires, MD, PhD,** Instituto de Ciencias Médicas, Las Tablas, Los Santos, Panama. PO Box 0710-00043. Phone: +507 65937727 [ilandires@institutodecienciasmedicas.org](mailto:ilandires@institutodecienciasmedicas.org) , [ivanlandires@yahoo.es](mailto:ivanlandires@yahoo.es)

**Table 1S**

| **Variable** | **All** | | **CKDDMI (n=32)** | | **CKHBPI (n=36)** | | **EHI (n=22)** | | **MeN (n=61)** | | **KW** | ***p*** |
| --- | --- | --- | --- | --- | --- | --- | --- | --- | --- | --- | --- | --- |
| Mean (SD) | Range  [min-max] | Mean (SD) | Range  [min-max] | Mean (SD) | Range  [min-max] | Mean (SD) | Range  [min-max] | Mean (SD) | Range  [min-max] |
| Age | 59.53 (13.69) | [22-92] | 63.06 (13.29) | [40-84] | 63.19 (14.18) | [41-92] | 57.95 (11.42) | [23-77] | 56.08 (13.67) | [22-78] | 6.348871 | 0.0958170 |
| SBP | 147.06 (22.79) | [100-200] | 150.19 (18.07) | [120-180] | 155.64 (18.3) | [120-200] | 125 (13.63) | [100-150] | 148.31 (25.3) | [110-200] | 27.775286 | 0.0000040 |
| DBP | 79.9 (11.86) | [40-120] | 75.47 (11.17) | [40-90] | 80.31 (7.96) | [65-95] | 75.91 (9.08) | [60-90] | 83.43 (13.86) | [50-120] | 9.597879 | 0.0223126 |
| GLU | 126.9 (64.48) | [60-491] | 178.34 (89.28) | [60-491] | 140.42 (75.94) | [65-388] | 89.05 (15.51) | [64-119.5] | 105.59 (17.88) | [71-155] | 34.058279 | 0.0000002 |
| CR | 5.69 (5.58) | [0.7-22] | 7.8 (5.23) | [0.7-19.1] | 7.21 (6.33) | [0.8-20.6] | 0.93 (0.16) | [0.7-1.3] | 5.4 (5.32) | [0.8-22] | 42.016415 | 0.0000000 |
| BUN | 39.46 (26.98) | [9-135] | 53 (28.33) | [9-135] | 46.06 (28.63) | [9-113] | 13.77 (3.83) | [9-24.2] | 37.74 (23.51) | [9.6-98] | 40.998683 | 0.0000000 |
| SUA0 | 6.87 (2.08) | [1.9-13] | 6.24 (2.23) | [1.9-11.6] | 6.04 (1.72) | [2.5-9.8] | 5.91 (1.68) | [2.9-10.9] | 8.04 (1.77) | [4.8-13] | 35.577881 | 0.0000001 |
| SUA1 | 6.4 (1.72) | [1.9-11.6] | 6.24 (2.23) | [1.9-11.6] | 6.04 (1.72) | [2.5-9.8] | 5.91 (1.68) | [2.9-10.9] | 6.87 (1.31) | [4-10.1] | 10.150830 | 0.0173266 |
| Na | 137.19 (4.21) | [122-145.3] | 135.47 (4.05) | [126-143] | 136.06 (3.35) | [129-143] | 141.68 (1.5) | [139.4-144.8] | 137.14 (4.32) | [122-145.3] | 42.532323 | 0.0000000 |
| K | 4.46 (0.73) | [2-7.3] | 4.39 (0.78) | [2.7-5.8] | 4.61 (0.79) | [2-6.6] | 4.05 (0.26) | [3.7-4.8] | 4.56 (0.75) | [2.4-7.3] | 17.301778 | 0.0006126 |
| Hb | 12.59 (2.32) | [6.9-18.1] | 11.48 (2.03) | [8.4-15.3] | 11.39 (2.12) | [6.9-16.9] | 15.02 (1.05) | [13.5-17.1] | 13 (2.1) | [8-18.1] | 46.963475 | 0.0000000 |

Abbreviations: SD, standard deviation; SBP, diastolic blood pressure; SBP, systolic blood pressure; GLU, glucose; CR, creatinine; BUN, blood urea nitrogen; SUA0, baseline serum uric acid levels before treatment; SUA1, serum uric acid levels after treatment initiation; Na, sodium; K, potassium; Hb, hemoglobin; Controls: CKDDMI, individuals with CKD caused by Diabetes Mellitus; CKHBPI, individuals with CKD caused by High Blood Pressure; EHI, exposed healthy individuals; Cases: MeN, Mesoamerican nephropathy; KW, Kruskal-Wallis test; *p-value*, significance association (p < 0.05).
